# Supplementary material for: Nicotinamide adenine dinucleotide as a photocatalyst
Source: PubMed Central journal article supplement (PMC6641943; doi:10.1126/sciadv.aax0501), 2019-07-19
Supplement: aax0501_SM.pdf [file aax0501_SM.pdf]

## Supplementary Materials for

### Nicotinamide adenine dinucleotide as a photocatalyst

Jinhyun Kim, Sahng Ha Lee, Florian Tieves, Caroline E. Paul, Frank Hollmann, Chan Beum Park\*

\*Corresponding author. Email: parkcb@kaist.ac.kr

Published 19 July 2019, *Sci. Adv.* **5**, eaax0501 (2019)

DOI: 10.1126/sciadv.aax0501

#### This PDF file includes:

- Fig. S1. Optical and electrochemical properties of  $\text{NAD}^+$ .
- Fig. S2. Photostability of  $\text{NAD}^+$ .
- Fig. S3. Formation of superoxide radicals by photoactivated  $\text{NAD}^+$ .
- Fig. S4. Use of Tris and Nash's reagent in quantification of hydroxyl radicals.
- Fig. S5. Solar-driven formation of hydroxyl radicals with  $\text{NAD}^+$ .
- Fig. S6.  $\text{NAD}^+$ -sensitized production of AgNPs without sacrificial electron donors.
- Fig. S7. Photocatalytic synthesis of AgNPs using  $\text{NAD}^+$  in a MOPS buffer.
- Fig. S8. Photoreduction of prosthetic FMN driven by  $\text{NAD}^+$ .
- Fig. S9. Light-driven enzymatic hydrogenation of  $\text{C}=\text{C}$  bonds using  $\text{NAD}^+$  and *TsOYE*.

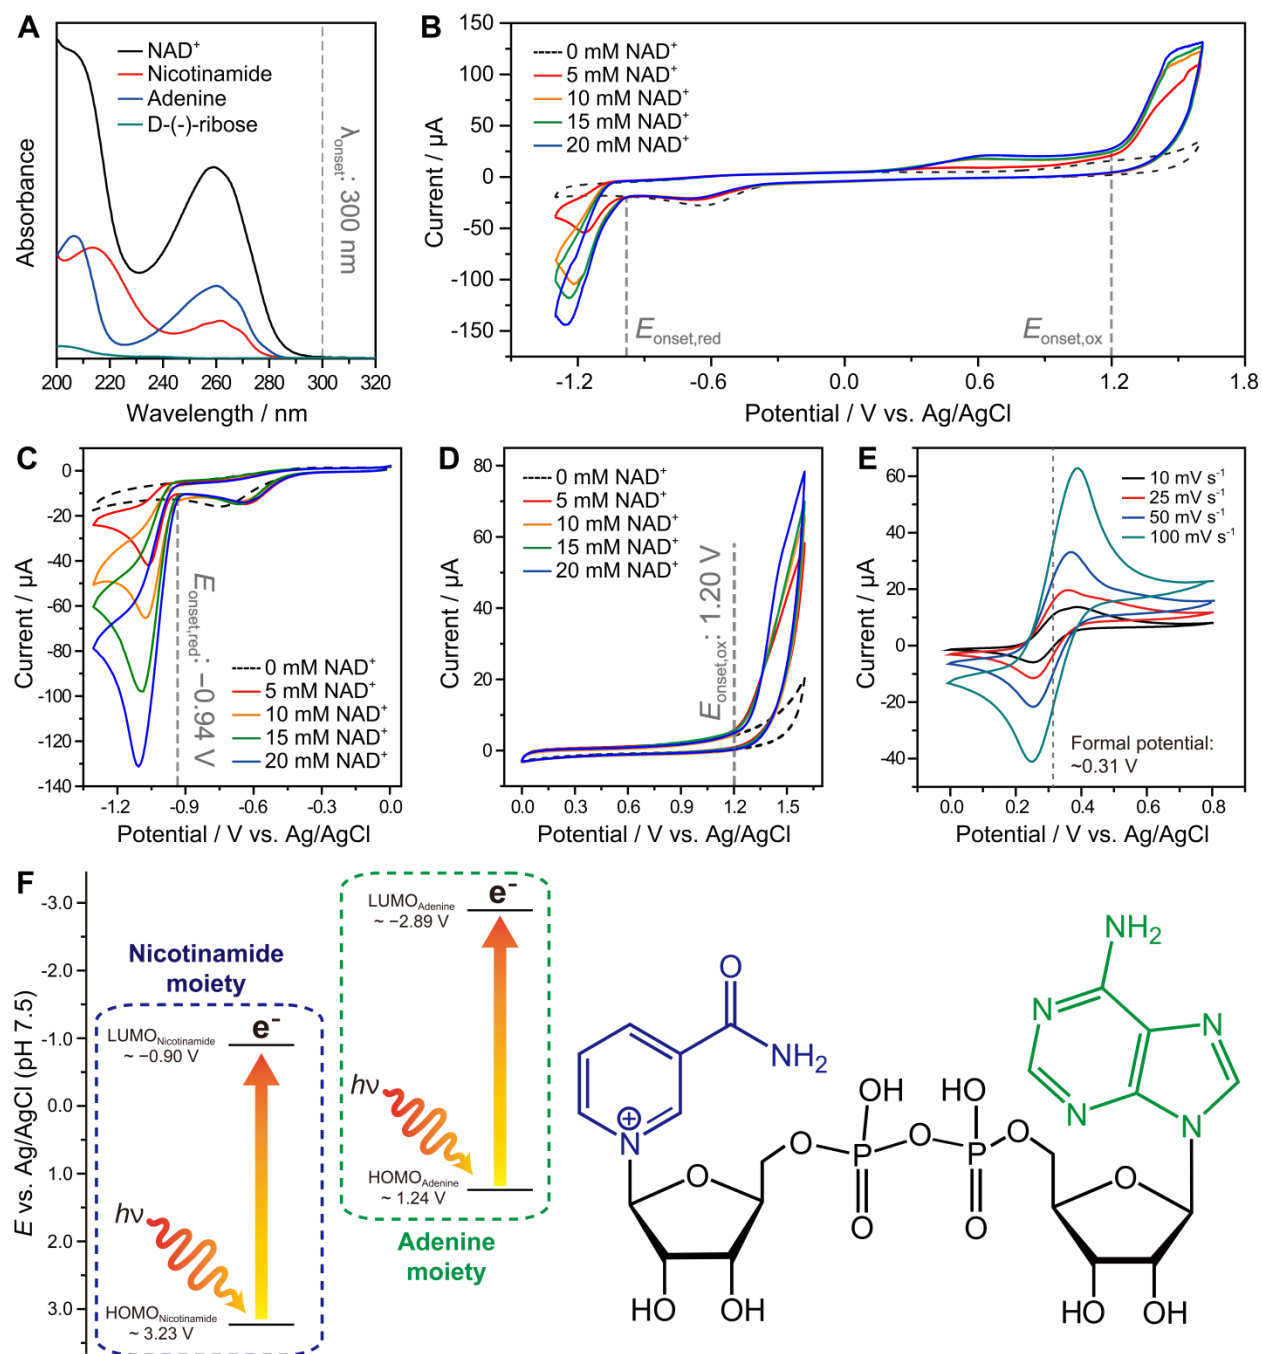

**Fig. S1. Optical and electrochemical properties of NAD<sup>+</sup>.** (A) UV-Vis absorption spectra of 50  $\mu\text{M}$  NAD<sup>+</sup>, 50  $\mu\text{M}$  nicotinamide, 50  $\mu\text{M}$  adenine, and 50  $\mu\text{M}$  D-(-)-ribose in deionized water. Cuvette path length: 1 cm. (B, C, D) Cyclic voltammograms of NAD<sup>+</sup> with different potential ranges. Working electrode: a polished glassy carbon electrode. Scan rate: 100  $\text{mV s}^{-1}$ . (E) Cyclic voltammograms of 5.38 mM ferrocene at different scan rates. Electrolyte solution of (B, C, D, E): 1/1 mixture of acetonitrile (containing 100 mM TBAPF<sub>6</sub>)/sodium phosphate buffer (100 mM, pH 7.5). The number of cycles of (B, C, D, E): 4. (F) Energy levels of nicotinamide and adenine moieties of NAD<sup>+</sup> (Left). Molecular structure of NAD<sup>+</sup> (Right).

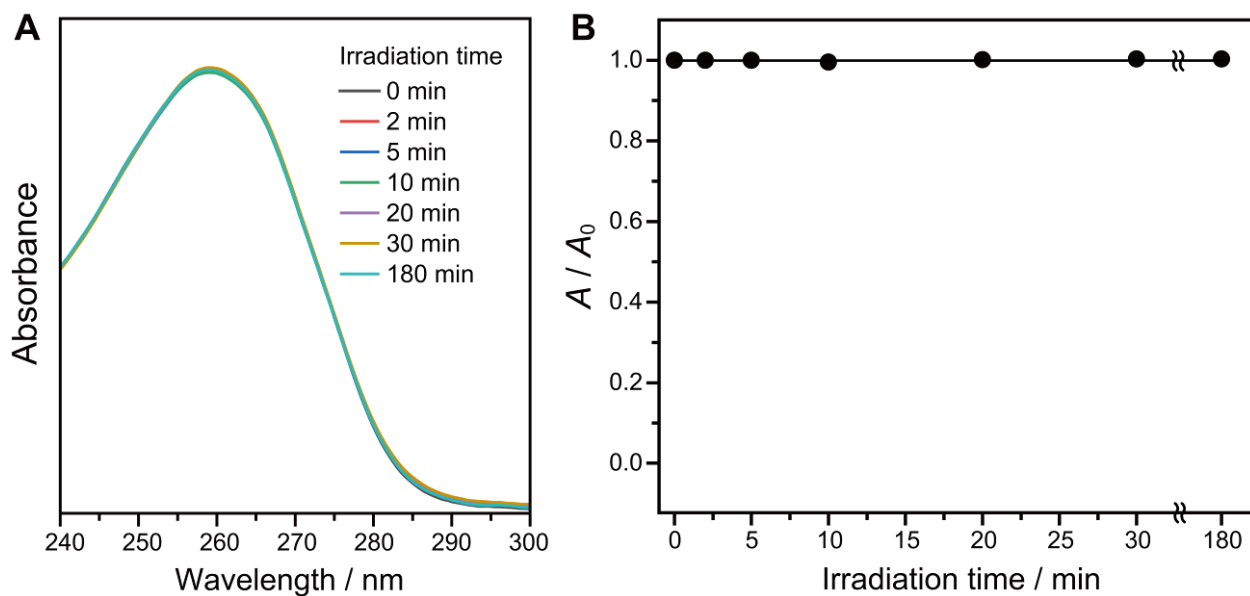

**Fig. S2. Photostability of NAD<sup>+</sup>.** (A) Spectrophotometric changes in the absorbance of NAD<sup>+</sup> under irradiation ( $\lambda$ : 260-900 nm,  $P_{260-900 \text{ nm}}$ : 200 mW cm<sup>-2</sup>,  $P_{260-300 \text{ nm}}$ : 10 mW cm<sup>-2</sup>) at 293.15 K. (B) Changes in relative absorbance ( $A/A_0$ ) of NAD<sup>+</sup> at 260 nm. Solvent: deionized water. Light source: a xenon lamp equipped with a water filter.

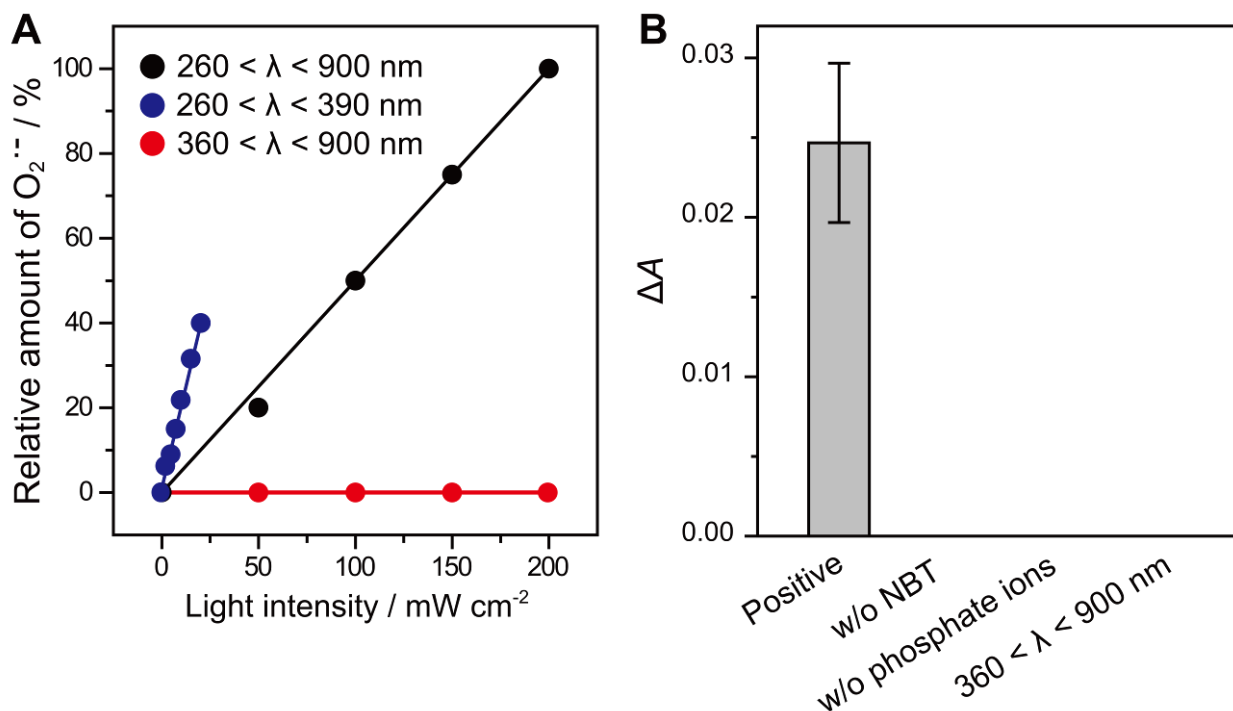

**Fig. S3. Formation of superoxide radicals by photoactivated  $\text{NAD}^+$ .** (A) Influence of wavelength range and light intensity on the light-driven formation of superoxide radicals. A buffered solution containing 1 mM  $\text{NAD}^+$  and 30  $\mu\text{M}$  NBT was irradiated with a xenon lamp with/without a filter for 30 min. Solvent: a sodium phosphate buffer (50 mM, pH 7.5,  $\text{O}_2$  purged). A relative amount of the radical is the normalized absorption intensity (at a given wavelength range and light intensity) to that at  $P_{260-900 \text{ nm}}$  of 200  $\text{mW cm}^{-2}$ . (B) Control experiments for a background reaction with NBT and phosphate ions under UV illumination. Reaction condition of the experimental group: 30  $\mu\text{M}$  NBT,  $\text{O}_2$ -purged sodium phosphate buffer (50 mM, pH 7.5), irradiation (Xenon lamp, 200  $\text{mW cm}^{-2}$ , 30 min). The measurement was performed in triplicate and all reported values represent the mean  $\pm$  standard deviation.

**A**Step I. Generation of formaldehyde from Tris and OH<sup>•</sup>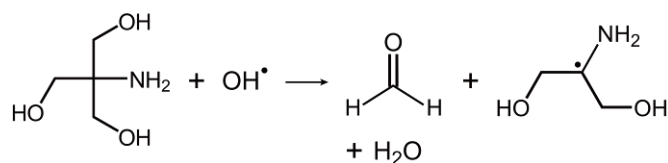

Step II. Quantification of formaldehyde using Nash's reagent

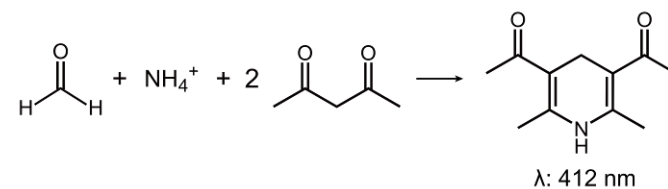**B**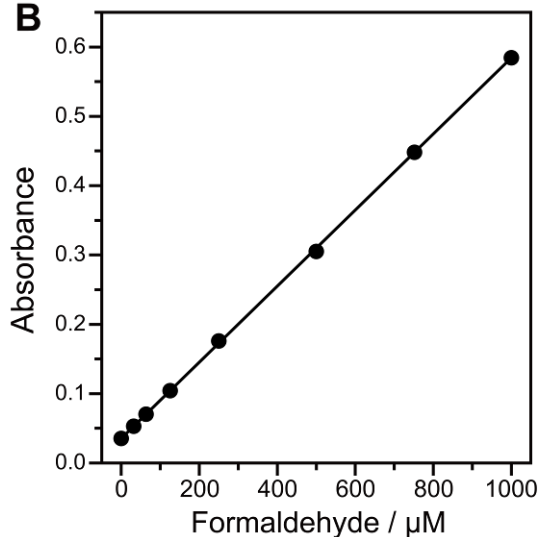

**Fig. S4. Use of Tris and Nash's reagent in quantification of hydroxyl radicals.** (A) Reaction between a Tris and a hydroxyl radical generates a formaldehyde molecule; one molecule of formaldehyde reacts with one ammonium ion and two molecules of acetylacetone to produce 1-(5-acetyl-2,6-dimethyl-1,4-dihydropyridin-3-yl)ethanone. The concentration of the final product can be quantitatively measured at 412 nm. (B) Calibration of formaldehyde using Nash's reagent. Absorbance at 412 nm was recorded for 0-1 mM formaldehyde after the incubation of a solution containing formaldehyde and Nash's reagent at 323.15 K for 1 h.

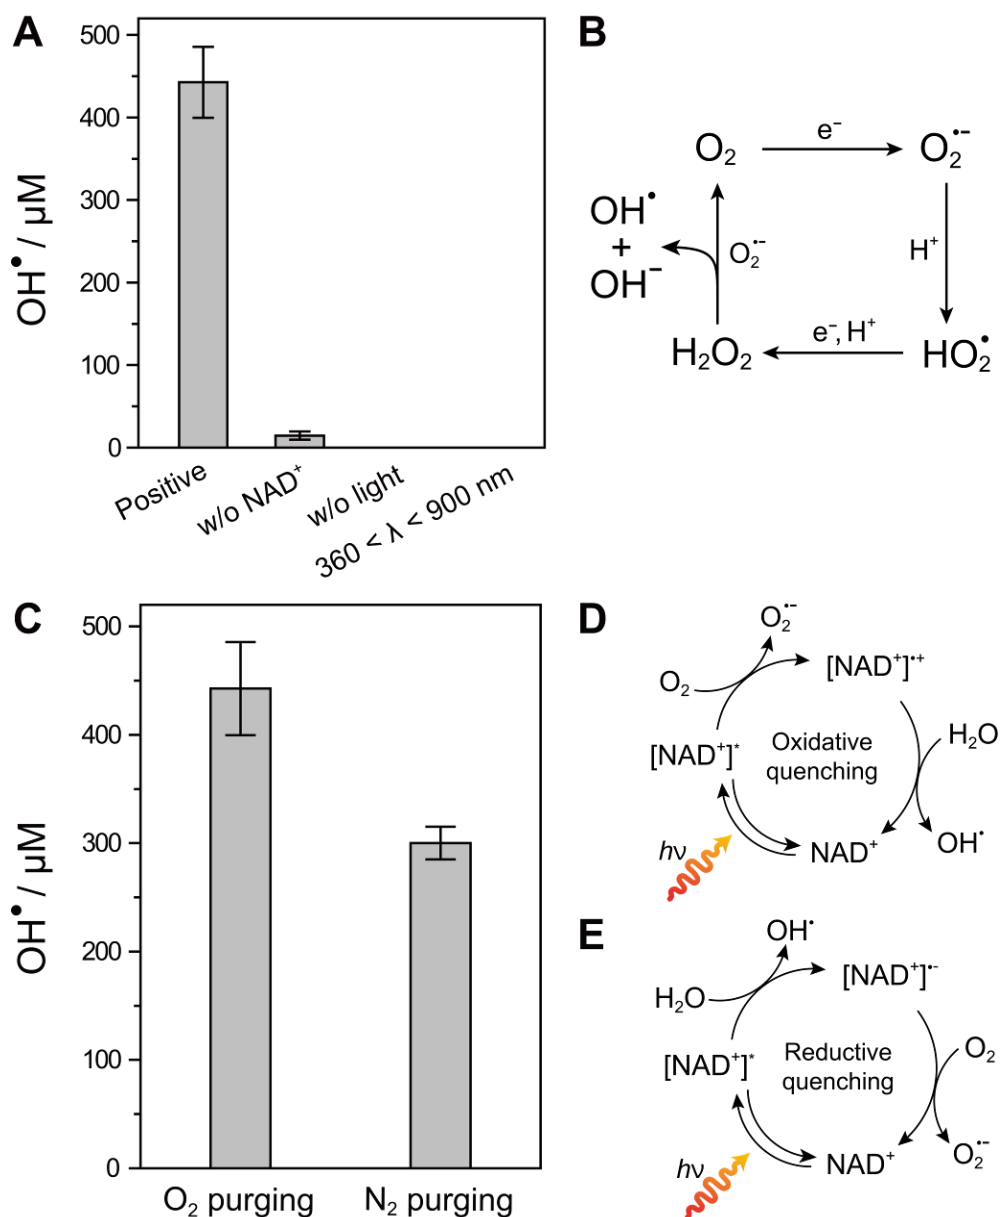

**Fig. S5. Solar-driven formation of hydroxyl radicals with  $\text{NAD}^+$ .** (A) Control experiments for  $\text{NAD}^+$ -sensitized formation of hydroxyl radicals. Reaction condition of the experimental group: 1 mM  $\text{NAD}^+$  and 10 mM Tris in an  $\text{O}_2$ -purged sodium phosphate buffer (50 mM, pH 7.5) under light condition ( $\lambda$ : 260-900 nm,  $P_{260-300 \text{ nm}}$ : 10 mW  $\text{cm}^{-2}$ ,  $P_{260-900 \text{ nm}}$ : 200 mW  $\text{cm}^{-2}$ ,  $t = 30 \text{ min}$ ). Temperature: 293.15 K. (B) Mechanism of  $\text{OH}^\bullet$  generation in the process of  $\text{O}_2$  reduction. Hydroxyl radicals can be formed via the reaction between  $\text{H}_2\text{O}_2$  and  $\text{O}_2^{\bullet -}$ . (C) Effect of the  $\text{N}_2$ -rich condition on the generation of hydroxyl radicals by  $\text{NAD}^+$  photocatalyst. Reaction condition: 1 mM  $\text{NAD}^+$  and 10 mM Tris in a sodium phosphate buffer (50 mM, pH 7.5) under irradiation ( $\lambda$ : 260-900 nm,  $P_{260-300 \text{ nm}}$ : 10 mW  $\text{cm}^{-2}$ ,  $P_{260-900 \text{ nm}}$ : 200 mW  $\text{cm}^{-2}$ ,  $t = 30 \text{ min}$ ) at 293.15 K. Error bars correspond to the standard deviation ( $n = 3$ ). (D, E) Two possible photocatalytic pathways of  $\text{NAD}^+$ -driven  $\text{O}_2$  reduction and  $\text{H}_2\text{O}$  oxidation. (D) Oxidative quenching step. (E) Reductive quenching step.

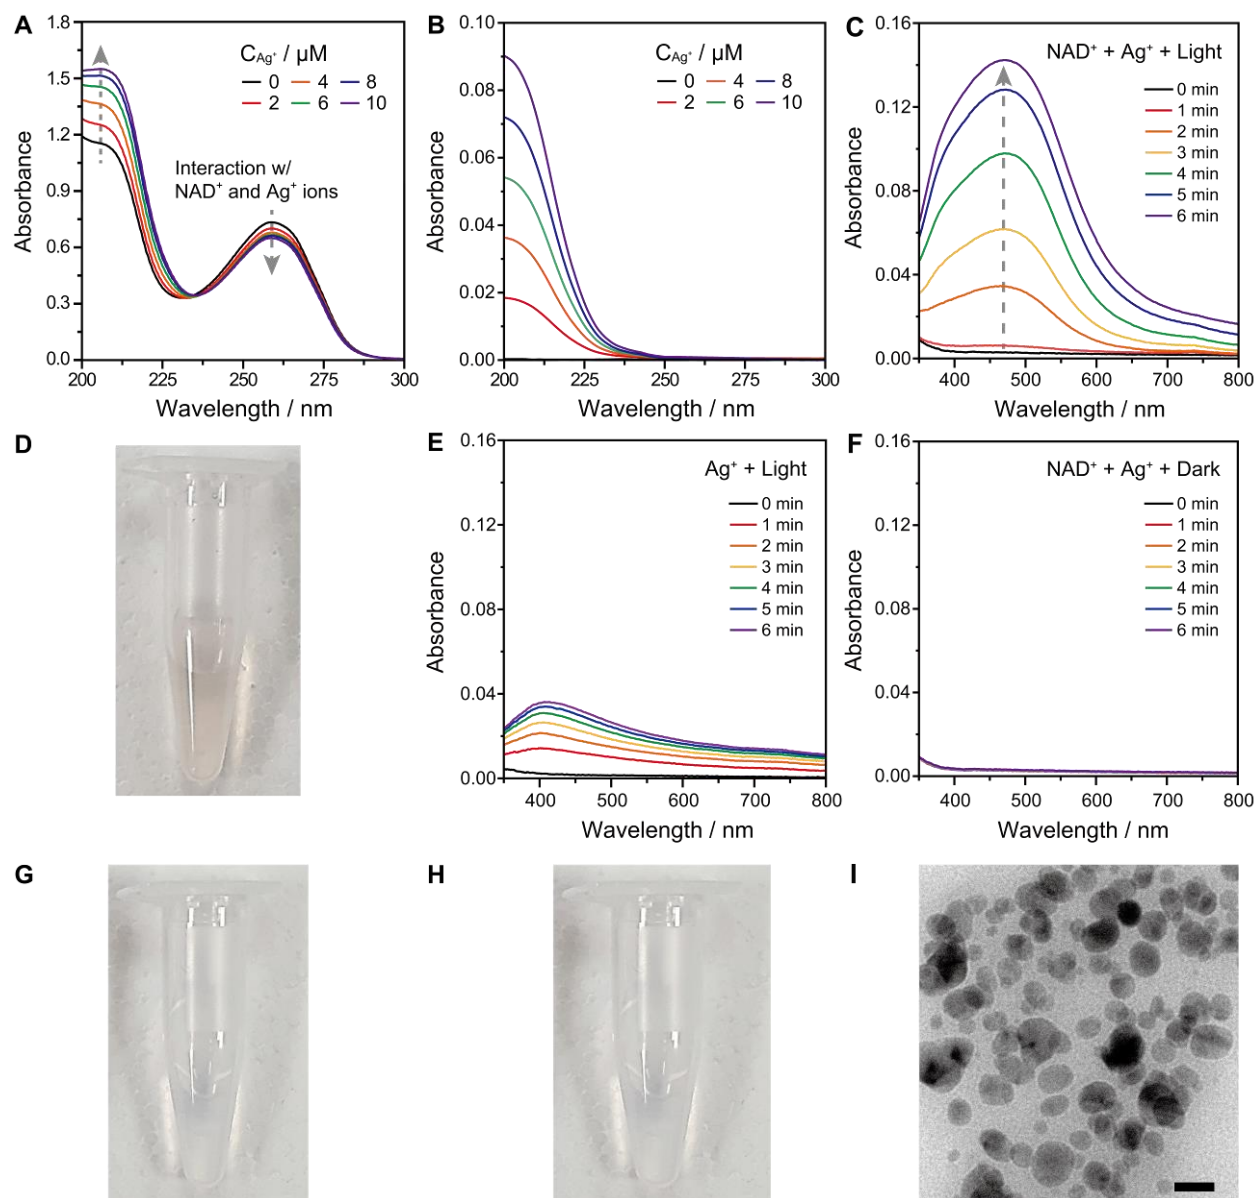

**Fig. S6. NAD<sup>+</sup>-sensitized production of AgNPs without sacrificial electron donors.** (A) Spectrophotometric changes in the absorbance of 50  $\mu\text{M}$  NAD<sup>+</sup> upon addition of Ag<sup>+</sup> ions at 293.15 K. (B) UV-Vis absorption spectra of AgNO<sub>3</sub> (0-10  $\mu\text{M}$ ). (C) Changes in absorption spectra of NAD<sup>+</sup>/Ag<sup>+</sup> mixture under illumination. Reaction condition: 0.5 mM NAD<sup>+</sup> and 1 mM AgNO<sub>3</sub> dissolved in a N<sub>2</sub>-purged deionized water. Light source: a xenon lamp equipped with an infrared filter ( $\lambda$ : 260-900 nm,  $P_{260-300 \text{ nm}}$ : 5 mW cm<sup>-2</sup>,  $P_{260-900 \text{ nm}}$ : 100 mW cm<sup>-2</sup>). (D) Photograph of the experimental group after 6-min illumination. (E, F) Changes in absorption spectra without (E) NAD<sup>+</sup> or (F) light. (G, H) Photographs of control groups in the absence of (G) NAD<sup>+</sup> or (H) light after 6-min reaction. (I) High resolution-transmission electron microscopy image of AgNPs shown in (C) under 6-min irradiation. Scale bar: 20 nm. Photo credit: Jinhyun Kim, Korea Advanced Institute of Science and Technology.

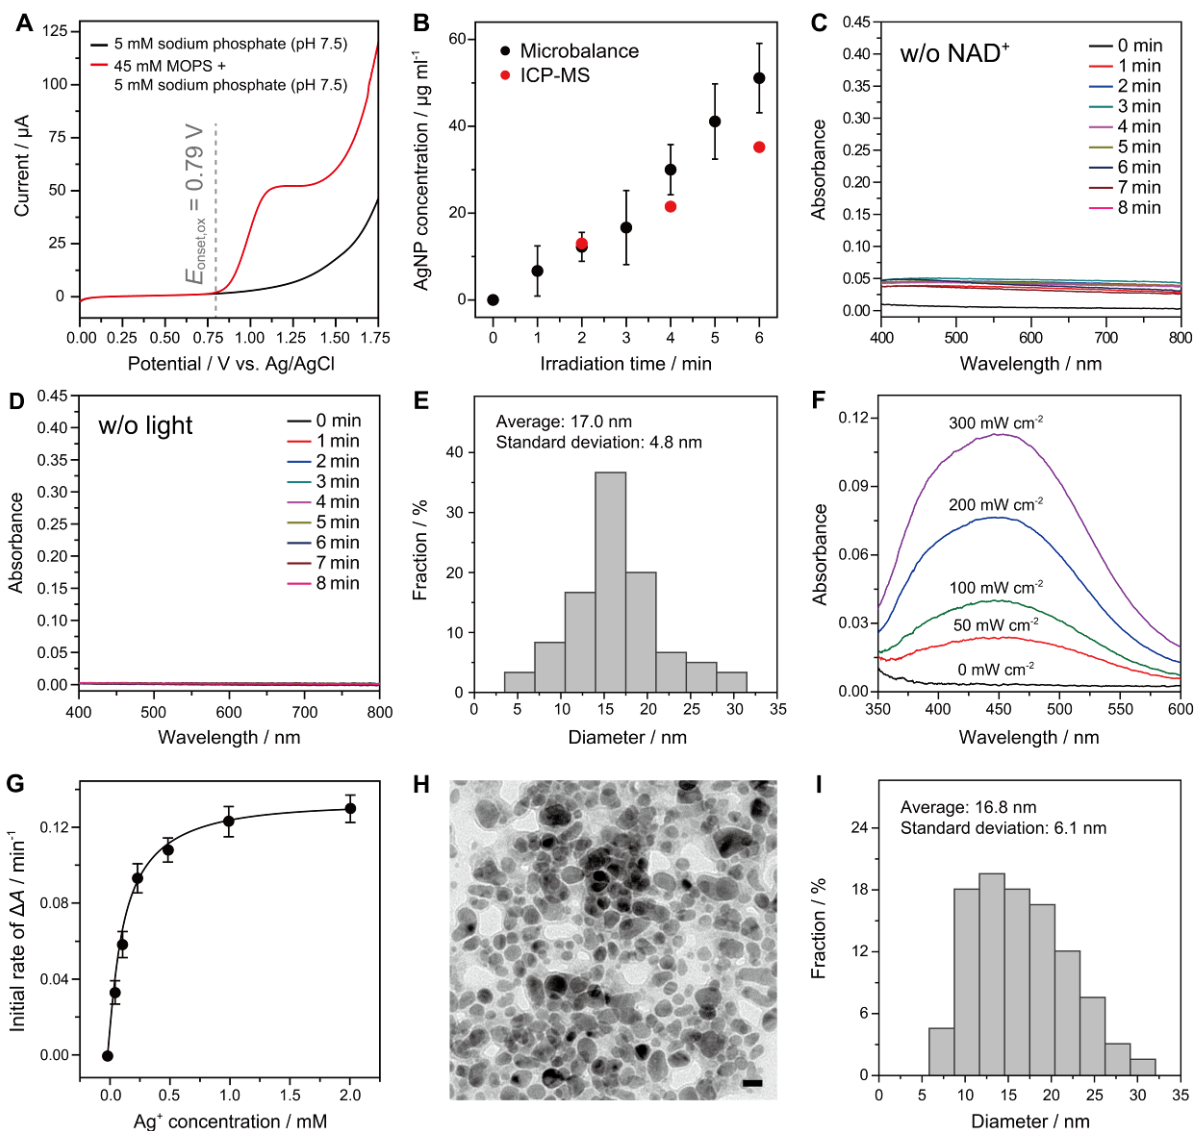

**Fig. S7. Photocatalytic synthesis of AgNPs using  $\text{NAD}^+$  in a MOPS buffer.** (A) Linear sweep voltammogram of MOPS. Working electrode: a polished glassy carbon electrode. Counter electrode: a Pt wire. Scan rate:  $25 \text{ mV s}^{-1}$ . (B) Quantification of AgNPs (shown in Fig. 3A) using an inductively coupled plasma mass spectrometer (ICP-MS) or a microbalance. (C, D) Control experiments of AgNP formation by photoexcited  $\text{NAD}^+$  without (C)  $\text{NAD}^+$  or (D) light. Experimental experiment: Fig. 3A. (E) Size distribution histogram of AgNPs formed by photoexcited  $\text{NAD}^+$  under 1-min irradiation. (F) Influence of light intensity on  $\text{NAD}^+$ -sensitized formation of AgNPs. Reaction condition:  $0.25 \text{ mM NAD}^+$ ,  $1 \text{ mM AgNO}_3$ ,  $\text{N}_2$ -purged MOPS buffer ( $50 \text{ mM}$ ,  $\text{pH } 7.5$ ), irradiation ( $P_{260-900 \text{ nm}}$ :  $100 \text{ mW cm}^{-2}$ ,  $t = 30 \text{ s}$ ),  $293.15 \text{ K}$ . (G) Effect of  $\text{Ag}^+$  concentration on  $\text{NAD}^+$ -sensitized growth of AgNPs. Reaction condition:  $10 \text{ }\mu\text{M NAD}^+$ ,  $\text{AgNO}_3$ ,  $\text{N}_2$ -purged MOPS buffer ( $50 \text{ mM}$ ,  $\text{pH } 7.5$ ), irradiation ( $P_{260-900 \text{ nm}}$ :  $100 \text{ mW cm}^{-2}$ ),  $293.15 \text{ K}$ .  $\Delta A \equiv A(t = 30 \text{ s}) - A(t = 0 \text{ s})$  at  $442 \text{ nm}$ . An error bar represents a standard deviation from three independent experiments. (H) High resolution-transmission electron microscopy image of AgNPs synthesized by photoactivated  $\text{NAD}^+$  under 6-min illumination. Scale bar:  $20 \text{ nm}$ . (I) Size distribution histogram of AgNPs shown in (H).



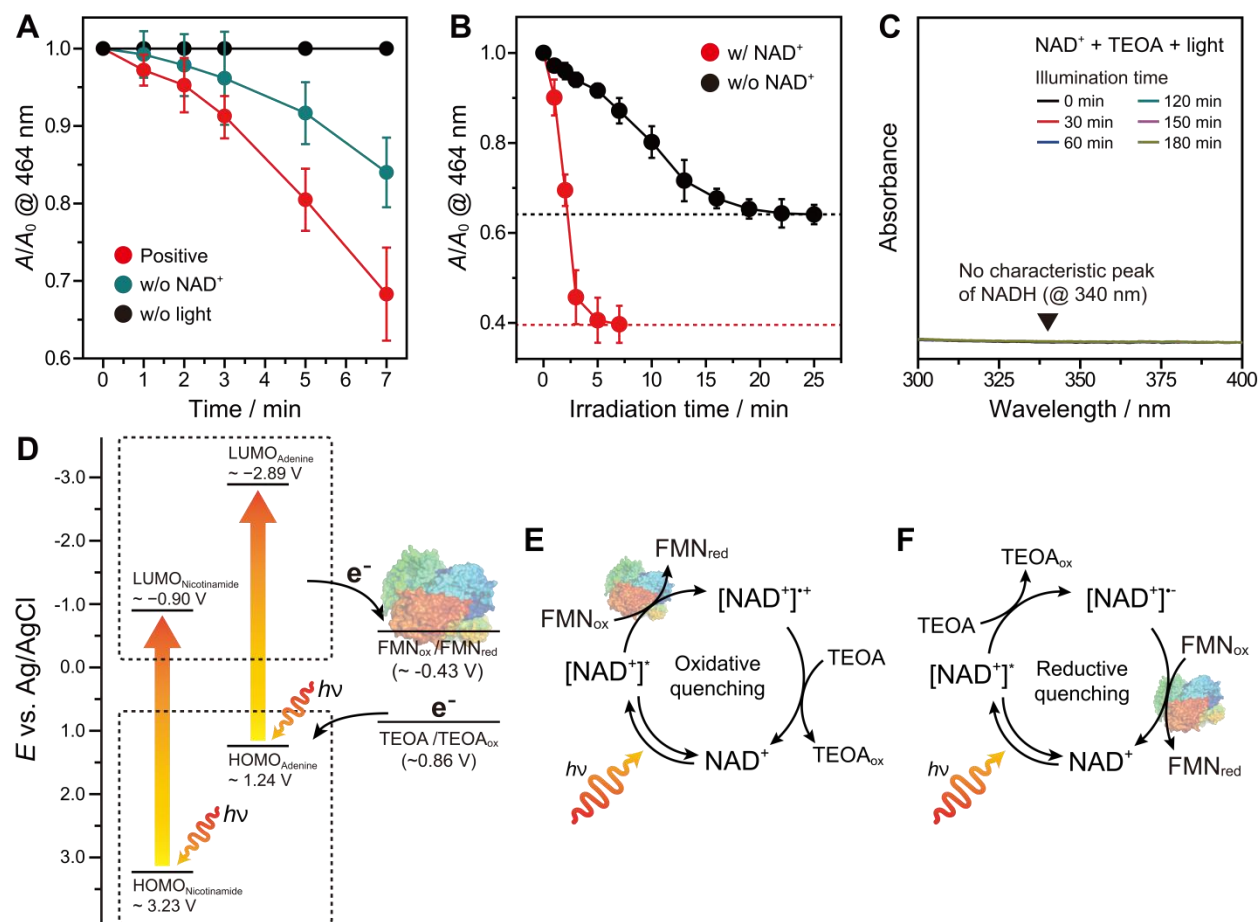

**Fig. S8. Photoreduction of prosthetic FMN driven by  $\text{NAD}^+$ .** (A)  $\text{NAD}^+$ -sensitized reduction of FMN bound to *TsOYE* in a MOPS buffer. Reaction condition of the experimental group:  $13.5 \mu\text{M}$  *TsOYE*,  $2 \text{ mM}$   $\text{NAD}^+$ , and  $5 \text{ mM}$   $\text{CaCl}_2$  in  $\text{N}_2$ -purged MOPS buffer ( $100 \text{ mM}$ ,  $\text{pH}$   $7.5$ ).  $P_{260-900 \text{ nm}}$ :  $0.485 \mu\text{E cm}^{-2} \text{ s}^{-1}$ . (B) Light-driven activation of prosthetic FMN with/without  $\text{NAD}^+$  in a TEOA buffer. Reaction condition of the experimental group:  $13.5 \mu\text{M}$  *TsOYE*,  $2 \text{ mM}$   $\text{NAD}^+$ , and  $5 \text{ mM}$   $\text{CaCl}_2$  in  $\text{N}_2$ -purged TEOA buffer ( $100 \text{ mM}$ ,  $\text{pH}$   $7.5$ ).  $P_{260-900 \text{ nm}}$ :  $0.485 \mu\text{E cm}^{-2} \text{ s}^{-1}$ . Error bars of (A) and (B): standard deviation ( $n = 3$ ). (C) Negligible formation of NADH from  $\text{NAD}^+$ . Absorption spectra of  $0.1 \text{ mM}$   $\text{NAD}^+$  in a TEOA buffer ( $5 \text{ mM}$ ,  $\text{pH}$   $7.5$ ) under illumination (Xenon lamp,  $\lambda$ :  $260-900 \text{ nm}$ ,  $P_{260-900 \text{ nm}}$ :  $0.970 \mu\text{E cm}^{-2} \text{ s}^{-1}$ ). (D) Energy diagram for prosthetic FMN reduction by photoactivated  $\text{NAD}^+$ . (E, F) Plausible mechanism of photoinduced reduction of prosthetic FMN by  $\text{NAD}^+$  through (E) an oxidative quenching step or (F) a reductive quenching step. Photosensitization of  $\text{NAD}^+$  excites its electrons from a ground state to the excited state. The photoexcited electrons possess a potential energy high enough to reduce the FMN prosthetic group. As a counterpart of the photocatalytic reduction, TEOA donates its electron to the oxidized  $\text{NAD}^+$ .

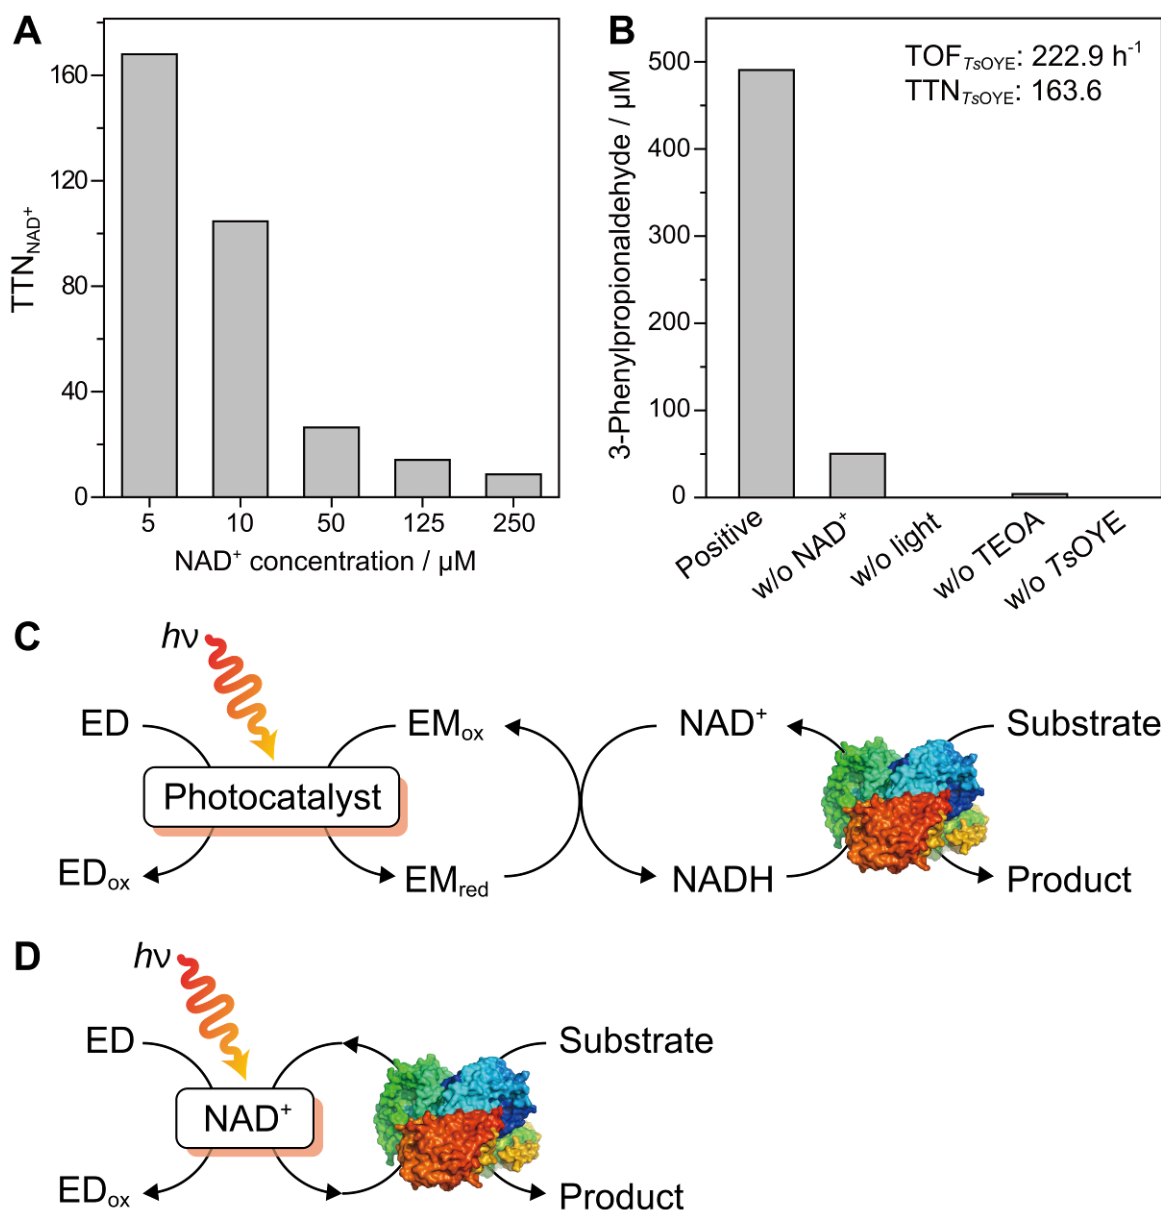

**Fig. S9. Light-driven enzymatic hydrogenation of C=C bonds using NAD<sup>+</sup> and TsOYE.** (A) TTN of NAD<sup>+</sup> in photoenzymatic reduction by TsOYE. Reaction conditions: NAD<sup>+</sup>, 9  $\mu\text{M}$  TsOYE, 5 mM CaCl<sub>2</sub>, and 6 mM 2-methyl-2-cyclohexen-1-one in a TEOA buffer (150 mM, pH 7.5) at 318.15 K.  $P_{260-900\text{ nm}}$ : 1.212  $\mu\text{E cm}^{-2}\text{ s}^{-1}$ . TTN<sub>NAD<sup>+</sup></sub>s were determined after 150 min of reaction. (B) A series of control experiments for each reaction components (i.e., NAD<sup>+</sup>, light, TEOA, TsOYE). Reaction condition of the experimental group: 1.5 mM NAD<sup>+</sup>, 3  $\mu\text{M}$  TsOYE, 5 mM CaCl<sub>2</sub>, and 6 mM *trans*-cinnamaldehyde in a TEOA buffer (150 mM, pH 7.5) at 318.15 K.  $P_{260-900\text{ nm}}$ : 1.212  $\mu\text{E cm}^{-2}\text{ s}^{-1}$ . TOF and TTN were determined after 30 and 120 min of reaction. The specific activity of TsOYE towards *trans*-cinnamaldehyde (1.16  $\mu\text{mol min}^{-1}\text{ mg}^{-1}$ ) is 24-times lower than that towards 2-methyl-2-cyclohexen-1-one (27.59  $\mu\text{mol min}^{-1}\text{ mg}^{-1}$ ) [Biochem. Biophys. Res. Commun. **393**, 426-431 (2010)]. (C, D) Comparison between (C) the conventional and (D) the new-found route for activation of oxidoreductases. ED: electron donor. EM: electron mediator.
